# Supplementary material for: Predictors of Higher Quality of Systematic Reviews Addressing Nutrition and Cancer Prevention
Source: MDPI journal article supplement (doi:10.3390/ijerph19010506), 2022-01-03

| Table S1. Summary information on the factors analysed as predictors based on all studies (101 studies)               |                                      |                 |
|----------------------------------------------------------------------------------------------------------------------|--------------------------------------|-----------------|
| Variable                                                                                                             | Variable                             | % (n)           |
| Elements of PICOT question                                                                                           |                                      |                 |
| Category (form) of intervention/exposure                                                                             | Supplement (vitamin/dietary/mineral) | 8.9 (9)         |
|                                                                                                                      | Others                               | 91.1 (92)       |
| Number of outcomes analysed in SR/MA                                                                                 | Continuous                           | 1 (1-23)*       |
| Type of outcomes studied                                                                                             | Unclear                              | 10.9 (11)       |
|                                                                                                                      | Clearly specified                    | 89.1 (90)       |
| Type of outcomes studied (n=90)                                                                                      | Only incidence or only mortality     | 75.2 (76)       |
|                                                                                                                      | Both                                 | 13.9 (14)       |
| Included RCTs                                                                                                        | Yes                                  | 13.9 (14)       |
|                                                                                                                      | No                                   | 86.1 (87)       |
| General information                                                                                                  |                                      |                 |
| Total number of included studies in SR/MA                                                                            | Continuous                           | 18 (5-572)*     |
| Year of publication                                                                                                  | 2010-2012                            | 21.8 (22)       |
|                                                                                                                      | 2013-2015                            | 41.6 (42)       |
|                                                                                                                      | 2016-2018                            | 36.6 (37)       |
| Country of the corresponding author                                                                                  | China                                | 48.5 (49)       |
|                                                                                                                      | Other than China                     | 51.5 (52)       |
|                                                                                                                      | No                                   | 35.6 (36)       |
| Impact factor value                                                                                                  | Continuous                           | 3.53 (0-51.27)* |
| Number of authors                                                                                                    | Continuous                           | 6 (1-48)*       |
| Systematic review process                                                                                            |                                      |                 |
| Information about the protocol of the review                                                                         | Yes                                  | 8.9 (9)         |
|                                                                                                                      | No                                   | 91.1 (92)       |
| Over 12 months between search and publication date                                                                   | Yes                                  | 25.7 (26)       |
|                                                                                                                      | No                                   | 70.3 (71)       |
|                                                                                                                      | NR                                   | 4.0 (4)         |
| Information about the search for unpublished studies/data                                                            | Yes                                  | 12.9 (13)       |
|                                                                                                                      | No                                   | 87.1 (88)       |
| Use of any applicable quality/RoB assessment for primary studies                                                     | Yes                                  | 51.5 (52)       |
|                                                                                                                      | No                                   | 48.5 (49)       |
| Systematic review analysis                                                                                           |                                      |                 |
| Reporting any subgroups                                                                                              | Yes                                  | 80.2 (81)       |
|                                                                                                                      | No                                   | 19.8 (20)       |
| Use of tests of interaction for subgroup analyses                                                                    | Yes                                  | 13.9 (14)       |
|                                                                                                                      | No                                   | 66.3 (67)       |
|                                                                                                                      | Not applicable                       | 19.8 (20)       |
| Publication bias/small study analysis                                                                                | Yes                                  | 82.2 (83)       |
|                                                                                                                      | No                                   | 17.8 (18)       |
| Was any sensitivity analysis reported                                                                                | Yes                                  | 65.3 (66)       |
|                                                                                                                      | No                                   | 34.7 (35)       |
| Total number of meta-analyses reported                                                                               | Continuous                           | 3 (0-64)*       |
| Referring to methods                                                                                                 |                                      |                 |
| Was the use of GRADE or other tool for overall quality-of-evidence assessment reported                               | Yes                                  | 5.0 (5)         |
|                                                                                                                      | No                                   | 95.0 (95)       |
| Referring to the use of PRISMA or MOOSE for reporting                                                                | One                                  | 42.6 (43)       |
|                                                                                                                      | Both                                 | 4.0 (4)         |
|                                                                                                                      | None                                 | 53.5 (54)       |
| Referring to use of the Cochrane Handbook or other methodological guidelines                                         | Yes                                  | 13.9 (14)       |
|                                                                                                                      | Both                                 | 1.0 (1)         |
|                                                                                                                      | None                                 | 85.1 (86)       |
| MA – metaanalysis; RCT - randomized controlled trials; RoB – risk of bias; SR – systematic review<br>*median (range) |                                      |                 |

| Table S2. Predictors of the number of 'No' answers in AMSTAR-2 (Poisson regression model). Listed variables were only used in univariate analyses and were not included in any of multivariable models (p value in all analyses >0.1) |                                      |                                            |                  |                                                |                  |                                      |                  |
|---------------------------------------------------------------------------------------------------------------------------------------------------------------------------------------------------------------------------------------|--------------------------------------|--------------------------------------------|------------------|------------------------------------------------|------------------|--------------------------------------|------------------|
| Variable (reference)                                                                                                                                                                                                                  | Variable                             | No. of 'No' responses in critical domains* |                  | No. of 'No' responses in non-critical domains* |                  | No. of 'No' responses in all domains |                  |
|                                                                                                                                                                                                                                       |                                      | Univariate IRR (95% CI)                    |                  | Univariate IRR (95% CI)                        |                  | Univariate IRR (95% CI)              |                  |
|                                                                                                                                                                                                                                       |                                      | All studies                                | With MA only     | All studies                                    | With MA only     | All studies                          | With MA only     |
| Category (form) of intervention /exposure (other)                                                                                                                                                                                     | Supplement (vitamin/dietary/mineral) | 0.89 (0.77–1.64)                           | 0.87 (0.58–1.31) | 0.83 (0.59–1.15)                               | 0.77 (0.55–1.09) | 0.85 (0.66–1.10)                     | 0.82 (0.64–1.04) |
| p value                                                                                                                                                                                                                               |                                      | 0.59                                       | 0.51             | 0.26                                           | 0.14             | 0.22                                 | 0.12             |
| Number of outcomes analyzed                                                                                                                                                                                                           |                                      | 1.01 (0.98–1.03)                           | 1.01(0.99–1.03)  | 1.00 (0.98–1.03)                               | 1.01 (0.99–1.03) | 1.01 (0.99–1.02)                     | 1.01 (0.99–1.02) |
| p value                                                                                                                                                                                                                               |                                      | 0.67                                       | 0.3              | 0.73                                           | 0.56             | 0.59                                 | 0.26             |
| Type of outcome studied (only incidence or only mortality)                                                                                                                                                                            | Both incidence and mortality         | 1.04 (0.77– 1.40)                          | 1.09 (0.84–1.41) | 0.94 (0.72–1.22)                               | 0.96 (0.75–1.23) | 0.98 (0.80–1.19)                     | 1.02 (0.85–1.22) |
| p value                                                                                                                                                                                                                               |                                      | 0.79                                       | 0.53             | 0.62                                           | 0.75             | 0.84                                 | 0.85             |

|                                    |                   |                     |                     |                  |                  |                  |                  |
|------------------------------------|-------------------|---------------------|---------------------|------------------|------------------|------------------|------------------|
| Type of outcomes studied (unclear) | Clearly specified | 0.88 (0.64–1.21)    | 0.83 (0.63 –1.09)   | 1.02 (0.77–1.36) | 0.98 (0.75–1.28) | 0.96 (0.77–1.18) | 0.91 (0.75–1.10) |
| p value                            |                   | 0.43                | 0.18                | 0.9              | 0.9              | 0.68             | 0.31             |
| Included RCTs ('No')               | Yes               | 0.8 (0.58-1.10)     | 0.79 (0.59-1.07)    | 0.81 (0.61-1.07) | 0.77 (0.58-1.01) | 0.80 (0.65-0.99) | 0.78 (0.64-0.95) |
| p value                            |                   | 0.17                | 0.12                | 0.13             | 0.07             | <b>0.04</b>      | <b>0.01</b>      |
| Total number of included studies   |                   | 1.001 (0.999–1.002) | 1.001 (0.999–1.002) | 1.00 (1.00–1.00) | 1.00 (1.00–1.00) | 1 (1–1)          | 1 (1–1)          |
| p value                            |                   | 0.38                | 0.33                | 0.33             | 0.28             | 0.19             | 0.15             |
| Impact factor value                |                   | 1 (0.98–1.02)       | 1 (0.98–1.01)       | 1 (0.98–1.01)    | 1 (0.98–1.01)    | 1.00 (0.99–1.01) | 1.00 (0.99–1.01) |
| p value                            |                   | 0.99                | 0.88                | 0.5              | 0.8              | 0.58             | 0.77             |
| Year of publication (2010–2012)    | 2013–2015         | 0.91 (0.71–1.18)    | 0.95 (0.75–1.21)    | 0.91 (0.73–1.14) | 0.91 (0.73–1.13) | 0.91 (0.77–1.08) | 0.93 (0.79–1.09) |
| p value                            |                   | 0.50                | 0.68                | 0.4              | 0.41             | 0.28             | 0.38             |
| Year of publication (2010–2012)    | 2016–2018         | 0.75 (0.57–0.99)    | 0.8 (0.62–1.03)     | 0.83 (0.65–1.05) | 0.83 (0.65–1.04) | 0.8 (0.67–0.95)  | 0.81 (0.69–0.96) |

|                                                           |     |                  |                  |                  |                  |                  |                  |
|-----------------------------------------------------------|-----|------------------|------------------|------------------|------------------|------------------|------------------|
| p value                                                   |     | <b>0.04</b>      | 0.08             | 0.11             | 0.12             | <b>0.01</b>      | <b>0.02</b>      |
| Over 12 months between search and publication date ('No') | NR  | 1.45 (0.92–2.29) | 1.42 (0.90–2.23) | 1.19 (0.78–1.82) | 1.16 (0.73–1.84) | 1.3 (0.95–1.77)  | 1.28 (0.93–1.77) |
| p value                                                   |     | 0.11             | 0.7              | 0.42             | 0.52             | 0.11             | 0.13             |
| Over 12 months between search and publication date ('No') | Yes | 1.07 (0.85–1.36) | 0.96 (0.77–1.19) | 1.03 (0.84–1.26) | 1.06 (0.87–1.28) | 1.05 (0.9–1.22)  | 1.01 (0.87–1.17) |
| p value                                                   |     | 0.57             | 0.12             | 0.8              | 0.59             | 0.58             | 0.89             |
| Reporting any subgroups (no)                              | Yes | 0.95 (0.72–1.23) | 0.97 (0.72–1.31) | 0.92 (0.73–1.15) | 0.93 (0.74–1.18) | 0.93 (0.78–1.11) | 0.93 (0.78–1.11) |
| P value                                                   |     | 0.68             | 0.85             | 0.47             | 0.57             | 0.41             | 0.43             |
| Was any sensitivity analysis reported ('No')              | Yes | 0.91 (0.73–1.13) | 0.92 (0.76–1.13) | 0.85 (0.71–1.02) | 0.86 (0.72–1.03) | 0.88 (0.76–1.01) | 0.89 (0.78–1.02) |
| p value                                                   |     | 0.38             | 0.43             | 0.08             | 0.11             | 0.06             | 0.08             |
| Publication bias analysis (no)                            | Yes | 0.95 (0.73–1.24) | 0.95 (0.73–1.24) | 0.96 (0.77–1.21) | 1.00 (0.78–1.27) | 0.96 (0.81–1.14) | 0.96 (0.81–1.14) |
| p value                                                   |     | 0.74             | 0.71             | 0.74             | 0.97             | 0.63             | 0.63             |
| Use of interaction tests (no)                             | Yes | –                | –                | –                | 0.91 (0.71–1.17) | –                | 0.96 (0.80–1.15) |

|                                                                                                            |            |                   |                  |                  |                  |                  |                  |
|------------------------------------------------------------------------------------------------------------|------------|-------------------|------------------|------------------|------------------|------------------|------------------|
| p value                                                                                                    |            |                   |                  |                  | 0.48             |                  | 0.66             |
| Use of interaction test (no)                                                                               | NA         | –                 | –                | –                | 1.20 (0.87–1.66) | –                | 1.19 (0.94–1.52) |
| p value                                                                                                    |            |                   |                  |                  | 0.27             |                  | 0.15             |
| Total number of meta-analyses reported                                                                     |            | 1.01 (0.99–1.02)  | 1.00 (0.99–1.01) | 1.00 (0.99–1.01) | 1.00 (0.99–1.01) | 1.00 (1.00–1.01) | 1.00 1.00–1.01)  |
| p value                                                                                                    |            | 0.39              | 0.43             | 0.76             | 0.53             | 0.43             | 0.32             |
| Was the use of GRADE or other tool for overall quality-of-evidence assessment reported (‘No’)              | Yes        | 0.38 (0.18–0.81)  | 0.46 (0.25–0.83) | 0.64 (0.39–1.06) | 0.68 (0.43–1.07) | 0.53 (0.35–0.81) | 0.57 (0.40–0.83) |
| p value                                                                                                    |            | <b>0.01</b>       | <b>0.01</b>      | 0.08             | 0.11             | <b>0.003</b>     | <b>0.003</b>     |
| Referring to the use of PRISMA or MOOSE for reporting (‘None’)                                             | At least 1 | 0.915 (0.74-1.13) | 0.96 (0.8-1.16)  | 0.96 (0.8-1.14)  | 0.96 (0.81-1.14) | 0.94 (0.82-1.08) | 0.96 (0.85-1.09) |
| p value                                                                                                    |            | 0.4               | 0.67             | 0.63             | 0.67             | 0.38             | 0.55             |
| Statistically significant results are bolded.                                                              |            |                   |                  |                  |                  |                  |                  |
| IRR = incidence rate ratio; NR = not reported; NA = not applicable; MA = meta-analysis; RoB = risk of bias |            |                   |                  |                  |                  |                  |                  |

\*The critical domains include: protocol content and registration (item 2), comprehensive research searches (item 4), argumentation for exclusion of research (item 7), adequate evaluation of study quality (item 9) and its influence on the results (item 13), proper synthesis of results (item 11) and investigation of the presence/impact of the publication bias/small study effect (item 15).

The non-critical domains include: the research question (item 1), explanation for study design selection (item 3), the transparency of the studies identification and extraction process (item 5 and 6), adequate characteristics of included papers (item 8), including funding (item 10), the impact of quality on the synthesized results (item 12), explaining heterogeneity (item 14) and reporting conflicts of interest and financing (item 16).

**Table S3. Predictors of the number of ‘Yes’ or ‘Probably Yes’ responses in ROBIS (Poisson regression) and at least one domain assessed as low risk of bias (logistic regression model).**

| Variable (reference)                                   | Variable                             | No. of ‘Yes’ or ‘Probably Yes’ responses in ROBIS# (Poisson regression) | At least one domain assessed as ‘low risk of bias’ (logistic regression) |
|--------------------------------------------------------|--------------------------------------|-------------------------------------------------------------------------|--------------------------------------------------------------------------|
|                                                        |                                      | Univariate IRR (95% CI)                                                 | Univariate OR (95% CI)                                                   |
| Category (form) of intervention/exposure (other)       | Supplement (vitamin/dietary/mineral) | 1.26 (1.03–1.53)                                                        | 3.333 (0.734–15.133)                                                     |
| p value                                                |                                      | <b>0.02</b>                                                             | 0.12                                                                     |
| Type of outcomes studied (unclear)                     | Clearly specified                    | 1.25 (1.01–1.55)                                                        | Not applicable*                                                          |
| p value                                                |                                      | <b>0.04</b>                                                             | Not applicable*                                                          |
| Type of outcomes studied (only incidence or mortality) | Both incidence and mortality         | 1.02 (0.85–1.21)                                                        | 1.455 (0.352–6.004)                                                      |
| p value                                                |                                      | 0.87                                                                    | 0.6                                                                      |
| Number of outcomes analyzed                            | –                                    | 1.00 (0.98–1.01)                                                        | 1.03 (0.91–1.17)                                                         |
| p value                                                |                                      | 0.56                                                                    | 0.65                                                                     |
| Were RCTs included (‘No’)                              | Yes                                  | 1.27 (1.08–1.5)                                                         | 4.278 (1.194–15.330)                                                     |
| p value                                                |                                      | <b>0.004</b>                                                            | <b>0.026</b>                                                             |
| Total number of included studies                       | –                                    | 1.00 (1.00–1.00)                                                        | 0.988 (0.954–1.023)                                                      |
| p value                                                |                                      | 0.21                                                                    | 0.49                                                                     |
| Year of publication (2010–2012)                        | 2013–2015                            | 1.20 (1.01–1.43)                                                        | 2 (0.378–10.569)                                                         |
| p value                                                |                                      | <b>0.03</b>                                                             | 0.414                                                                    |
| Year of publication (2010–2012)                        | 2016–2018                            | 1.28 (1.08–1.52)                                                        | 1.935 (0.355–10.554)                                                     |
| p value                                                |                                      | <b>0.006</b>                                                            | 0.445                                                                    |

|                                                                                  |            |                  |                       |
|----------------------------------------------------------------------------------|------------|------------------|-----------------------|
| Search vs publication date >12 months?<br>(‘No’)                                 | NR         | 0.51 (0.33–0.79) | Not applicable*       |
| p value                                                                          |            | <b>0.002</b>     | –                     |
| Search vs publication date >12 months?<br>(‘No’)                                 | Yes        | 1.03 (0.89–1.18) | Not applicable*       |
| p value                                                                          |            | 0.71             |                       |
| Impact factor                                                                    | –          | 1.00 (0.99–1.01) | 1.002 (0.917–1.095)   |
| p value                                                                          |            | 0.65             | 0.96                  |
| Was any sensitivity analysis reported<br>(‘No’)                                  | Yes        | 1.12 (0.98–1.28) | 0.552 (0.182–1.674)   |
| p value                                                                          |            | 0.11             | 0.29                  |
| Reporting any subgroups (no)                                                     | Yes        | 1.12 (0.95–1.32) | 0.870 (0.218–3.466)   |
| p value                                                                          |            | 0.18             | 0.84                  |
| Publication bias analysis (no)                                                   | Yes        | 1.05 (0.89–1.23) | 1.183 (0.297–4.715)   |
| p value                                                                          |            | 0.6              | 0.81                  |
| Total number of meta-analyses for<br>dietary intake and serum levels<br>reported | –          | 1.00 (0.99–1.01) | 1.006 (0.948–1.067)   |
| p value                                                                          |            | 0.92             | 0.95                  |
| Was reported use of GRADE or other<br>for overall quality of evidence (‘No’)     | Yes        | 1.65 (1.32–2.07) | 10.375 (1.569–68.595) |
| p value                                                                          |            | <b>&lt;0.001</b> | <b>0.015</b>          |
| Referring to the use of PRISMA or<br>MOOSE for reporting (‘None’)                | At least 1 | 1.06 (0.94–1.20) | 1.01 (0.34–3.02)      |
| p value                                                                          |            | 0.33             | 0.99                  |



|                                                                                                                                                                                                                                                                                                                                                                                                                                                                                                                                                                                                                                                                          |            |                  |                  |
|--------------------------------------------------------------------------------------------------------------------------------------------------------------------------------------------------------------------------------------------------------------------------------------------------------------------------------------------------------------------------------------------------------------------------------------------------------------------------------------------------------------------------------------------------------------------------------------------------------------------------------------------------------------------------|------------|------------------|------------------|
| Referring to use of the Cochrane Handbook or other methodological guidelines ('None')                                                                                                                                                                                                                                                                                                                                                                                                                                                                                                                                                                                    | At least 1 | 1.31 (1.12-1.53) | 2.48 (0.67-9.17) |
| p value                                                                                                                                                                                                                                                                                                                                                                                                                                                                                                                                                                                                                                                                  |            | <b>0.001</b>     | 0.17             |
| <p>A p value was less than 0.1 in the univariate analysis for all listed variables that were taken into account in at least one multivariable model.</p> <p>* Impossible to estimate due to insufficient number of studies.</p> <p># The assessment is carried out in four domains that may introduce bias: (1) study eligibility criteria (5 questions); (2) identification and selection of studies (5 questions); (3) data collection and study appraisal (5 questions); and (4) synthesis and findings (6 questions).</p> <p>Statistically significant results are bolded.</p> <p>NR = not reported; NA = not applicable; MA = meta-analysis; RoB = risk of bias</p> |            |                  |                  |

**Table S4. Detailed analysis by ROBIS domain**

| Domain                        | Information about the protocol of the review                        |      |         |            |       |         | p value* |
|-------------------------------|---------------------------------------------------------------------|------|---------|------------|-------|---------|----------|
|                               | No (n=92)                                                           |      |         | Yes (n=9)  |       |         |          |
|                               | High                                                                | Low  | Unclear | High       | Low   | Unclear |          |
| Concerns eligibility          | 97.8                                                                | 1.1  | 1.1     | 55.6       | 44.4  | 0.0     | <0.001   |
| Concerns meth. identification | 95.7                                                                | 3.3  | 1.1     | 66.7       | 33.3  | 0.0     | 0.02     |
| Concerns meth. collection     | 89.10                                                               | 9.80 | 1.10    | 66.70      | 22.20 | 11.10   | 0.049    |
| Concerns meth. synthesis      | 94.60                                                               | 2.20 | 3.30    | 66.70      | 22.20 | 11.10   | 0.022    |
|                               | Inclusion of RCTs                                                   |      |         |            |       |         |          |
|                               | No (n=87)                                                           |      |         | Yes (n=14) |       |         |          |
|                               | High                                                                | Low  | Unclear | High       | Low   | Unclear |          |
| Concerns eligibility          | 96.6                                                                | 2.3  | 1.1     | 78.6       | 21.4  | 0.0     | 0.034    |
| Concerns meth. identification | 94.3                                                                | 4.6  | 1.1     | 85.7       | 14.3  | 0.0     | 0.31     |
| Concerns meth. collection     | 90.8                                                                | 8.0  | 1.1     | 64.3       | 28.6  | 7.1     | 0.03     |
| Concerns meth. synthesis      | 95.4                                                                | 2.3  | 2.3     | 71.4       | 14.3  | 14.3    | 0.02     |
|                               | Information about the search for unpublished studies                |      |         |            |       |         |          |
|                               | No or NR (n=88)                                                     |      |         | Yes (n=13) |       |         |          |
|                               | High                                                                | Low  | Unclear | High       | Low   | Unclear |          |
| Concerns eligibility          | 97.7                                                                | 1.1  | 1.1     | 69.2       | 30.8  | 0.0     | 0.001    |
| Concerns meth. identification | 96.6                                                                | 2.3  | 1.1     | 69.2       | 30.8  | 0.0     | 0.002    |
| Concerns meth. collection     | 92.0                                                                | 6.8  | 1.1     | 53.8       | 38.5  | 7.7     | 0.001    |
| Concerns meth. synthesis      | 95.5                                                                | 1.1  | 3.4     | 69.2       | 23.1  | 7.7     | 0.005    |
|                               | Use of GRADE or other methods to assess overall quality of evidence |      |         |            |       |         |          |
|                               | No (n=95)                                                           |      |         | Yes (n=5)  |       |         |          |
|                               | High                                                                | Low  | Unclear | High       | Low   | Unclear |          |
| Concerns eligibility          | 96.8                                                                | 2.1  | 1.1     | 40.0       | 60.0  | 0.0     | 0.01     |
| Concerns meth. identification | 94.7                                                                | 4.2  | 1.1     | 60.0       | 40.0  | 0.0     | 0.04     |

|                               |                                                           |            |                |                  |            |                |                  |
|-------------------------------|-----------------------------------------------------------|------------|----------------|------------------|------------|----------------|------------------|
| Concerns meth. collection     | 89.5                                                      | 9.5        | 1.1            | 40.0             | 40.0       | 20.0           | <b>0.008</b>     |
| Concerns meth. synthesis      | 93.7                                                      | 2.1        | 4.2            | 60.0             | 40.0       | 0.0            | <b>0.002</b>     |
|                               | <b>Use of at least one quality or RoB assessment tool</b> |            |                |                  |            |                |                  |
|                               | <b>Yes (n=52)</b>                                         |            |                | <b>No (n=49)</b> |            |                |                  |
|                               | <b>High</b>                                               | <b>Low</b> | <b>Unclear</b> | <b>High</b>      | <b>Low</b> | <b>Unclear</b> |                  |
| Concerns eligibility          | 90.40                                                     | 9.60       | 0.00           | 98.00            | 0.00       | 2.00           | 0.057            |
| Concerns meth. identification | 90.40                                                     | 9.60       | 0.00           | 95.90            | 2.00       | 2.00           | 0.21             |
| Concerns meth. collection     | 75.00                                                     | 21.20      | 3.80           | 100.00           | 0.00       | 0.00           | <b>&lt;0.001</b> |
| Concerns meth. synthesis      | 84.60                                                     | 7.70       | 7.70           | 100.00           | 0.00       | 0.00           | <b>0.006</b>     |

Data are presented as percentage of studies.

Statistically significant results are bolded.

\* $\chi^2$  or Fisher test

NR = not reported; NA = not applicable; MA = meta-analysis; meth. = methodological; RoB = risk of bias; RCT = randomized controlled trial

**Figure S1. Study flowchart (based on Zajac, J., et al., Are systematic reviews addressing nutrition for cancer prevention trustworthy? A systematic survey of quality and risk of bias *Nutr. Rev.* 2021., 10.1093/nutrit/nuab093. In press, modified)**

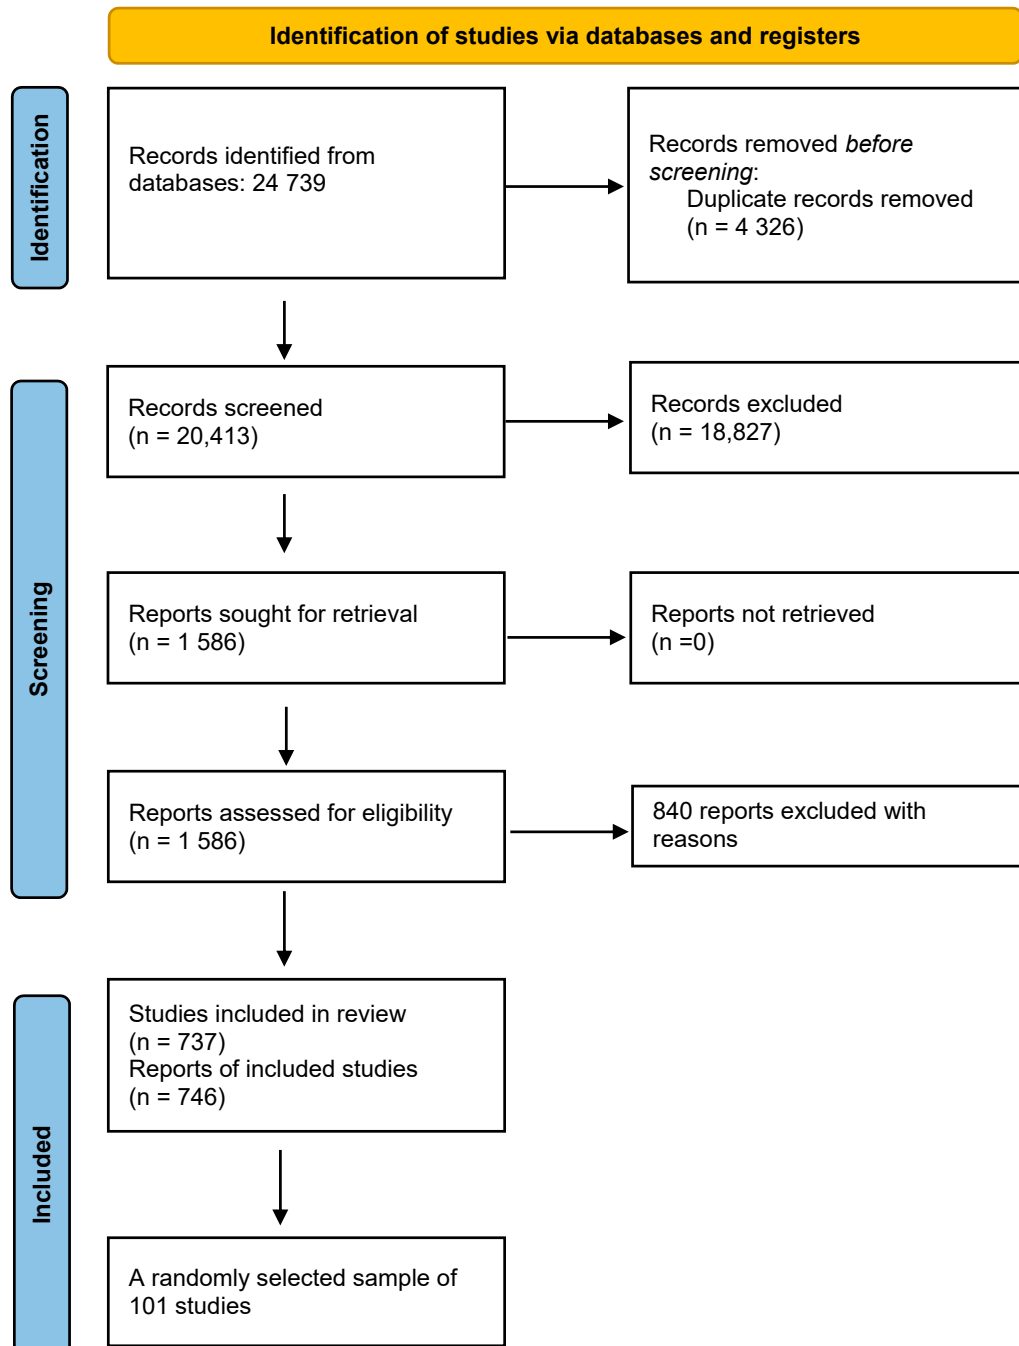

Supplement: s1 [file s1]
